# Supplementary material
Source: Springer Nature journal article supplement (https://www.springermedizin.de/resource/supplementary/12936_2009_1102_MOESM7_ESM.pdf/9549418)

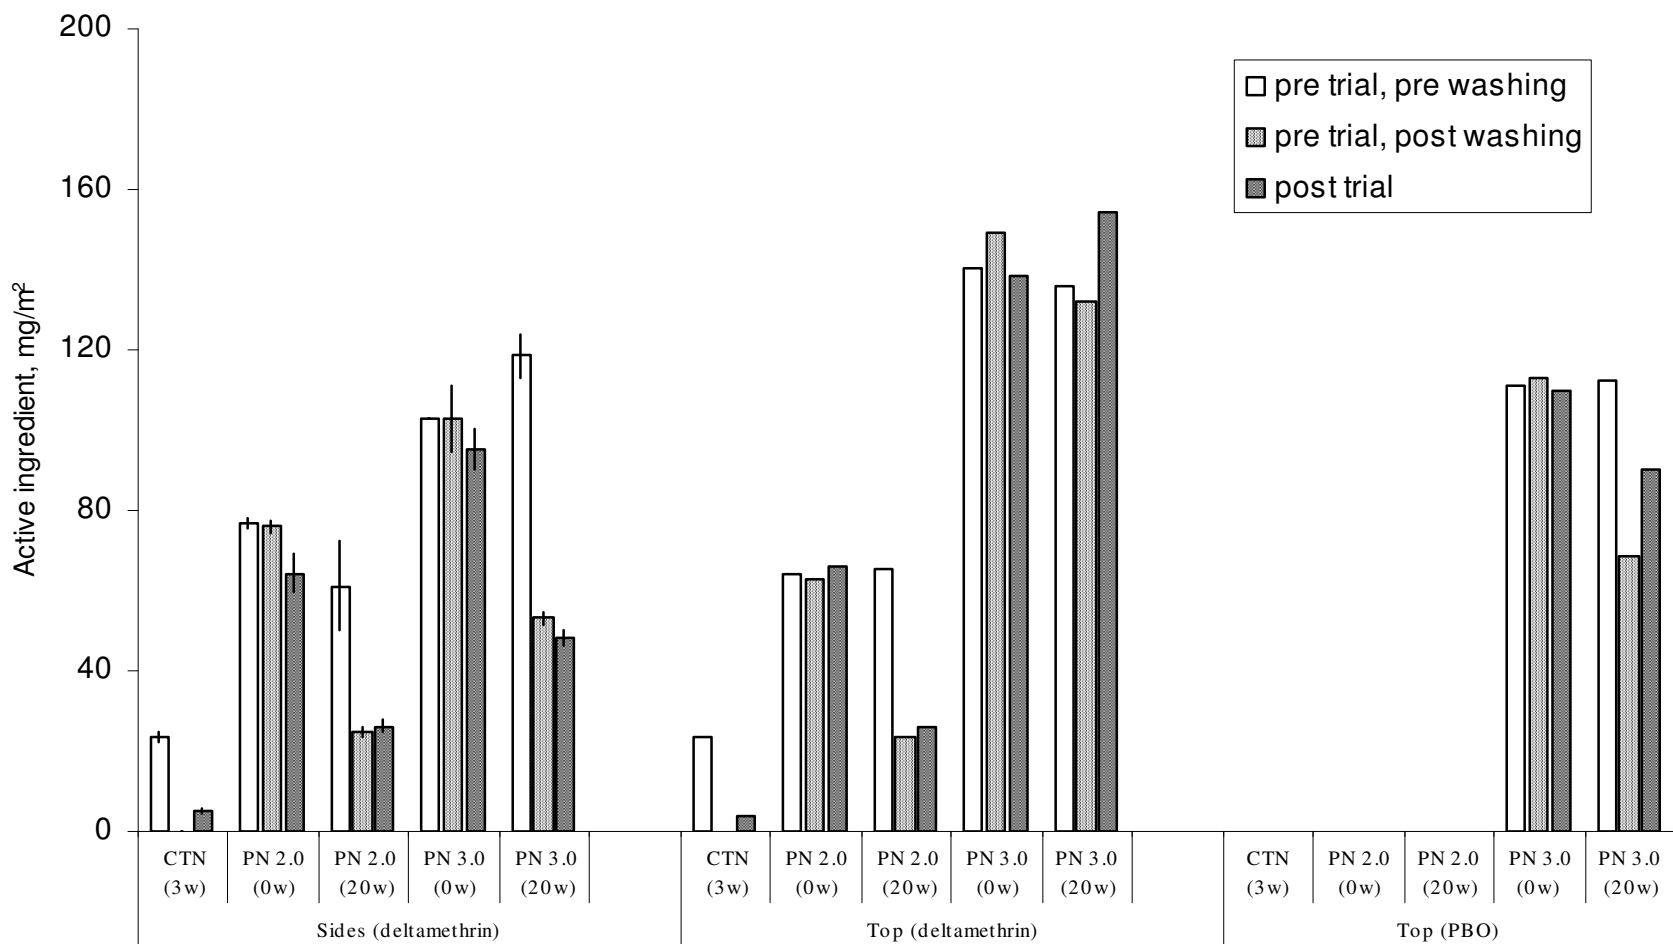

Supplement: MOESM7 [file 9549418]
